# Supplementary material
Source: PubMed Central journal article supplement (PMC4017241)
Supplement: NIHMS575293-supplement-01.pdf [file NIHMS575293-supplement-01.pdf]

## **Supporting Information Materials and Methods**

### **Culture of mouse embryonic stem cell (mES) and iPS cells without feeder cells.**

mES and iPS cells were maintained as undifferentiated cells on gelatin coated plates as a feeder free culture as described in [31] with some modifications. Specifically, cells were cultured in mESC media containing 10% FBS supplemented with 6-bromoindirubin-3'-oxime (BIO), a specific inhibitor of glycogen synthase kinase-3 (GSK-3).

### **Purification of mES and iPS cells from feeder by MACS and FACS.**

Ten million of mESC and iPSC with feeder cells were resuspended in 100  $\mu$ l of MACS buffer (0.5% BSA and 2mM EDTA in PBS) containing 2  $\mu$ g of mouse Fc block (BD Biosciences, San Jose, CA). The cells were incubated with 5  $\mu$ l of anti-SSEA-1 conjugated with Phycoerythrin (PE, Santa Cruz Biotechnology, Santa Cruz, CA) for 15 min on ice, followed by incubation with 100  $\mu$ l of MACS buffer containing PE-microbeads for 15 min on ice and MACS purification (Miltenyi Biotec, Auburn, CA). The purity of SSEA1-positive cells was analyzed by FACS using FACSCalibur (BD Biosciences, San Jose, CA) and the CellQuest program (BD Biosciences, San Jose, CA). Mouse IgM-PE (Santa Cruz) was used as an isotype control.

**Supporting Information Table S1.** Primer sequences used in quantitative PCR analysis

| Gene    |   | Primer sequences for QPCR     | Annealing temperatures |
|---------|---|-------------------------------|------------------------|
| Nanog   | F | 5'-ATGCCTGCAGTTTTTCATCC-3'    | 60                     |
|         | R | 5'-GAGCTTTTGTGGGACTGG-3'      |                        |
| Sox2    | F | 5'-CAACTCGGAGATCAGCAAGC-3'    | 60                     |
|         | R | 5'-CGGGAAGCGTGTACTTATCC-3'    |                        |
| Oct4    | F | 5'-GAGGAGTCCCAGGACATGAA-3'    | 60                     |
|         | R | 5'-AGATGGTGGTCTGGCTGAAC-3'    |                        |
| HNF4a   | F | 5'-TGACGGGACCAAGTACAACC-3'    | 60                     |
|         | R | 5'-GTCTGCTTCTGACCCTCTCC-3'    |                        |
| AFP     | F | 5'-CCAGGAAGTCTGTTTCACAGAAG-3' | 60                     |
|         | R | 5'-CAAAAGGCTCACACCAAAGAG-3'   |                        |
| Albumin | F | 5'-ACACAAGCCCAAGGCTAC-3'      | 60                     |
|         | R | 5'-TGCATCTAGTGACAAGTTTGG-3'   |                        |
| CK18    | F | 5'-GACTGGGGCCACTACTTCAA-3'    | 60                     |
|         | R | 5'-CATCTACCACCTTGCGGAGT-3'    |                        |
| G6P     | F | 5'-TCTGTCCCGGATCTACCTTG-3'    | 60                     |
|         | R | 5'-GTCCACCCCTAGCCCTTTTA-3'    |                        |
| Lman2l  | F | 5'-ACGGGAGCACTCGCTGTCTCGA-3'  | 57                     |
|         | R | 5'-GCACCCGGTTCCACAAGGCA-3'    |                        |
| Irf1    | F | 5'-TCTGTTCCGGAGCTGGGCCA-3'    | 57                     |
|         | R | 5'-CGCACAGCAGAGCTGCCCTT-3'    |                        |
| Maml1   | F | 5'-CAGCAGGGCTTGCCTGGCTT-3'    | 57                     |
|         | R | 5'-GGCTGCCCGCTGTAGGCAA-3'     |                        |
| Smarca2 | F | 5'-ACAGGAGGTGGTGGCCTGCA-3'    | 57                     |
|         | R | 5'-CCTGGTGTCTGCGGCGT-3'       |                        |
| Rbm15   | F | 5'-AGCAATGGGAGCAGCAGCGG-3'    | 57                     |
|         | R | 5'-TCGCCCCCGCCTGAGGAATT-3'    |                        |
| Rnf135  | F | 5'-TCTGCGCCCCAGGTGACAGT-3'    | 57                     |
|         | R | 5'-ATCCGTGGGTGGGTGCCTT-3'     |                        |
| GAPDH   | F | 5'-CATGGCCTCCAAGGAGTAAG-3'    | 57                     |
|         | R | 5'-TGTGAGGGAGATGCTCAGTG-3'    |                        |

**Supporting Information Table S2.** HB-iPSC gene signature.

Up-regulated genes (109)

| Gene          | Average Expression Value |         |          | BT-ANOVA P-value | Contrast P-value (iPSC) |           | Log2 Fold Changes |
|---------------|--------------------------|---------|----------|------------------|-------------------------|-----------|-------------------|
|               | AH-iPSC                  | HB-iPSC | MEF-iPSC |                  | AH vs HB                | HB vs MEF |                   |
| 1110002N22Rik | 605.59                   | 1198.96 | 763.77   | < 2e-16          | < 2e-16                 | < 2e-16   | 0.81              |
| 1810009N02Rik | 41.62                    | 79.06   | 48.46    | 0.0203           | 0.0087                  | 0.0271    | 0.81              |
| 2610019A05Rik | 109.72                   | 168.88  | 100.97   | 0.0150           | 0.0148                  | 0.0075    | 0.68              |
| 5730596K20Rik | 105.86                   | 169.78  | 109.02   | 0.0177           | 0.0112                  | 0.0135    | 0.66              |
| Adamts4       | 47.76                    | 99.01   | 55.97    | 0.0048           | 0.0023                  | 0.0086    | 0.93              |
| Ak3l1         | 615.51                   | 1014.04 | 524.51   | 0.0001           | 0.0001                  | < 2e-16   | 0.83              |
| Alkbh5        | 192.77                   | 297.22  | 189.91   | 0.0368           | 0.0258                  | 0.0247    | 0.64              |
| Anxa3         | 172.38                   | 463.17  | 286.12   | 0.0054           | 0.0021                  | 0.0299    | 1.01              |
| Axin2         | 106.73                   | 737.15  | 282.37   | < 2e-16          | < 2e-16                 | < 2e-16   | 1.92              |
| Bag2          | 27.08                    | 72.37   | 45.83    | 0.0122           | 0.0058                  | 0.0318    | 0.99              |
| BC005682      | 58.13                    | 112.17  | 73.09    | 0.0100           | 0.0035                  | 0.0237    | 0.77              |
| BC023829      | 47.63                    | 139.83  | 81.16    | < 2e-16          | < 2e-16                 | 0.0007    | 1.12              |
| Bmp7          | 51.75                    | 111.34  | 65.80    | 0.0100           | 0.0039                  | 0.0180    | 0.92              |
| Ccno          | 39.00                    | 178.18  | 85.02    | 0.0002           | 0.0001                  | 0.0008    | 1.52              |
| Cdc37         | 97.73                    | 160.82  | 92.03    | 0.0305           | 0.0241                  | 0.0174    | 0.76              |
| Cfl1          | 189.84                   | 377.79  | 186.54   | < 2e-16          | < 2e-16                 | < 2e-16   | 1.01              |
| Chrd          | 84.39                    | 224.22  | 47.95    | 0.0001           | 0.0002                  | 0.0001    | 1.76              |
| Chst1         | 114.29                   | 592.13  | 213.61   | < 2e-16          | < 2e-16                 | < 2e-16   | 1.85              |
| Chst7         | 36.03                    | 83.56   | 47.07    | 0.0010           | 0.0003                  | 0.0012    | 1.01              |
| Col16a1       | 113.28                   | 460.45  | 130.48   | 0.0321           | 0.0204                  | 0.0247    | 1.92              |
| Creb3l2       | 37.43                    | 62.71   | 41.57    | 0.0126           | 0.0074                  | 0.0188    | 0.67              |
| Cyp7b1        | 50.97                    | 137.49  | 70.64    | 0.0008           | 0.0005                  | 0.0009    | 1.18              |
| Cyr61         | 21.21                    | 165.42  | 104.60   | < 2e-16          | < 2e-16                 | 0.0002    | 1.39              |
| Disp1         | 65.79                    | 99.86   | 65.84    | 0.0020           | 0.0019                  | 0.0023    | 0.60              |
| Dlk1          | 38.70                    | 94.25   | 32.03    | 0.0011           | 0.0010                  | 0.0004    | 1.41              |
| Egr1          | 4392.67                  | 7155.06 | 1848.30  | 0.0002           | 0.0023                  | 0.0001    | 1.20              |
| Eomes         | 17.81                    | 180.21  | 79.03    | 0.0004           | 0.0002                  | 0.0010    | 1.90              |
| Evx1          | 28.44                    | 83.35   | 31.73    | 0.0008           | 0.0003                  | 0.0008    | 1.47              |
| Fam169b       | 148.57                   | 265.18  | 171.29   | 0.0002           | 0.0001                  | 0.0004    | 0.73              |
| Flrt3         | 147.98                   | 245.89  | 150.10   | < 2e-16          | 0.0001                  | 0.0001    | 0.72              |
| Foxq1         | 22.09                    | 109.44  | 45.97    | 0.0144           | 0.0065                  | 0.0188    | 1.69              |
| Gad1          | 26.95                    | 163.68  | 66.09    | < 2e-16          | 0.0001                  | < 2e-16   | 1.81              |
| Gps1          | 682.41                   | 1117.34 | 710.67   | 0.0002           | 0.0001                  | 0.0003    | 0.68              |
| Hist1h2ab     | 42.91                    | 96.42   | 60.11    | 0.0007           | 0.0002                  | 0.0008    | 0.90              |
| Hist1h3a      | 224.19                   | 877.85  | 488.09   | < 2e-16          | < 2e-16                 | 0.0002    | 1.30              |
| Hist1h3c      | 24.29                    | 126.89  | 76.79    | < 2e-16          | < 2e-16                 | 0.0006    | 1.33              |

|              |        |         |         |         |         |         |      |
|--------------|--------|---------|---------|---------|---------|---------|------|
| Hist1h3d     | 432.71 | 1508.40 | 930.62  | < 2e-16 | < 2e-16 | < 2e-16 | 1.15 |
| Hist1h3e     | 449.45 | 1709.00 | 1054.37 | < 2e-16 | < 2e-16 | 0.0002  | 1.18 |
| Hist1h3h     | 22.61  | 110.40  | 42.62   | < 2e-16 | < 2e-16 | < 2e-16 | 1.76 |
| Hist1h4j     | 169.15 | 347.71  | 215.57  | 0.0001  | 0.0001  | 0.0003  | 0.85 |
| Hoxa5        | 22.74  | 85.43   | 32.00   | 0.0008  | 0.0007  | 0.0025  | 1.64 |
| Id3          | 53.97  | 137.35  | 72.22   | 0.0002  | 0.0002  | 0.0008  | 1.12 |
| Igfbp3       | 21.40  | 243.69  | 126.18  | 0.0009  | 0.0005  | 0.0060  | 1.72 |
| Irf1         | 689.84 | 1316.51 | 871.70  | < 2e-16 | < 2e-16 | 0.0001  | 0.75 |
| Irx3         | 21.81  | 89.64   | 38.74   | 0.0331  | 0.0156  | 0.0434  | 1.57 |
| Itga1        | 26.23  | 63.26   | 29.80   | 0.0027  | 0.0021  | 0.0048  | 1.18 |
| Klhl25       | 46.55  | 81.57   | 41.14   | 0.0045  | 0.0060  | 0.0025  | 0.90 |
| Krt18        | 47.38  | 164.79  | 102.22  | 0.0041  | 0.0014  | 0.0291  | 1.14 |
| Krt8         | 268.31 | 1053.84 | 327.74  | 0.0007  | 0.0002  | 0.0004  | 1.82 |
| Ldhc         | 23.49  | 92.36   | 28.52   | < 2e-16 | < 2e-16 | < 2e-16 | 1.83 |
| Leprel2      | 57.48  | 139.91  | 79.06   | 0.0095  | 0.0037  | 0.0179  | 1.04 |
| Lman2l       | 316.62 | 522.10  | 348.05  | < 2e-16 | < 2e-16 | < 2e-16 | 0.65 |
| LOC100044190 | 79.71  | 166.30  | 84.65   | < 2e-16 | < 2e-16 | < 2e-16 | 1.02 |
| LOC100047028 | 74.04  | 142.40  | 77.17   | 0.0053  | 0.0030  | 0.0055  | 0.91 |
| Ltb          | 33.04  | 134.24  | 35.82   | 0.0001  | 0.0001  | 0.0001  | 1.96 |
| Ltbp3        | 91.96  | 174.81  | 89.72   | 0.0288  | 0.0220  | 0.0194  | 0.94 |
| Magmas       | 37.34  | 71.89   | 42.51   | 0.0066  | 0.0033  | 0.0118  | 0.85 |
| Mam1l        | 64.93  | 125.22  | 79.90   | 0.0026  | 0.0012  | 0.0053  | 0.79 |
| Meis2        | 33.52  | 57.23   | 34.82   | 0.0098  | 0.0063  | 0.0098  | 0.74 |
| Mgp          | 22.77  | 733.06  | 142.21  | 0.0037  | 0.0033  | 0.0029  | 3.15 |
| Mpp1         | 502.06 | 763.47  | 498.97  | 0.0003  | 0.0004  | < 2e-16 | 0.61 |
| Mrgprf       | 30.71  | 51.14   | 27.61   | 0.0080  | 0.0093  | 0.0070  | 0.81 |
| Msx1         | 21.53  | 56.36   | 28.68   | 0.0006  | 0.0002  | 0.0006  | 1.17 |
| Mtvr2        | 107.95 | 213.08  | 131.11  | 0.0006  | 0.0002  | 0.0014  | 0.83 |
| Nedd9        | 32.25  | 62.55   | 40.13   | 0.0046  | 0.0021  | 0.0084  | 0.79 |
| Nod1         | 384.92 | 623.06  | 389.09  | < 2e-16 | < 2e-16 | 0.0001  | 0.69 |
| Notum        | 167.67 | 350.97  | 66.06   | < 2e-16 | < 2e-16 | < 2e-16 | 1.59 |
| Nrp1         | 29.27  | 204.82  | 63.79   | 0.0018  | 0.0006  | 0.0045  | 2.14 |
| Osm          | 16.85  | 77.58   | 12.76   | < 2e-16 | 0.0001  | < 2e-16 | 2.39 |
| Osmr         | 30.88  | 109.96  | 44.49   | 0.0448  | 0.0297  | 0.0444  | 1.55 |
| Pdia6        | 123.48 | 206.61  | 116.71  | 0.0048  | 0.0043  | 0.0023  | 0.78 |
| Pemt         | 30.21  | 87.76   | 45.08   | 0.0039  | 0.0009  | 0.0085  | 1.22 |
| Pes1         | 490.68 | 1113.93 | 473.31  | < 2e-16 | < 2e-16 | < 2e-16 | 1.21 |
| Pou6f1       | 31.31  | 116.30  | 37.75   | 0.0001  | 0.0001  | 0.0001  | 1.75 |
| Prkg2        | 37.05  | 60.59   | 36.78   | 0.0031  | 0.0023  | 0.0019  | 0.71 |
| Prrc1        | 597.48 | 1507.75 | 711.56  | < 2e-16 | < 2e-16 | < 2e-16 | 1.20 |
| Pscd2        | 22.29  | 43.73   | 25.27   | 0.0003  | 0.0001  | 0.0012  | 0.88 |
| Psors1c2     | 21.38  | 101.95  | 39.07   | 0.0003  | < 2e-16 | 0.0003  | 1.75 |
| Rab38        | 16.97  | 43.53   | 21.48   | 0.0042  | 0.0020  | 0.0046  | 1.18 |

|            |         |         |         |         |         |         |      |
|------------|---------|---------|---------|---------|---------|---------|------|
| Rac3       | 175.41  | 409.46  | 271.86  | < 2e-16 | < 2e-16 | 0.0019  | 0.87 |
| Rbm15      | 105.81  | 258.28  | 161.94  | 0.0001  | 0.0001  | 0.0004  | 0.95 |
| Rhoj       | 22.14   | 50.62   | 22.53   | 0.0002  | 0.0001  | 0.0004  | 1.18 |
| Rnf135     | 93.26   | 275.33  | 141.38  | < 2e-16 | < 2e-16 | < 2e-16 | 1.23 |
| Rps15a     | 300.20  | 523.53  | 334.89  | 0.0042  | 0.0021  | 0.0057  | 0.72 |
| Rspo3      | 26.81   | 58.86   | 29.05   | 0.0198  | 0.0178  | 0.0168  | 1.08 |
| S100a4     | 20.05   | 47.97   | 26.72   | 0.0210  | 0.0105  | 0.0423  | 1.04 |
| Scap       | 76.89   | 119.29  | 73.07   | 0.0014  | 0.0015  | 0.0006  | 0.67 |
| Scarf2     | 148.73  | 513.34  | 222.35  | 0.0234  | 0.0106  | 0.0378  | 1.47 |
| Serpinf1   | 247.97  | 853.30  | 397.52  | 0.0305  | 0.0126  | 0.0496  | 1.40 |
| Setd7      | 15.43   | 36.74   | 22.74   | 0.0219  | 0.0088  | 0.0288  | 0.94 |
| Sf3a2      | 44.80   | 76.03   | 49.32   | 0.0135  | 0.0066  | 0.0151  | 0.69 |
| Sh3pxd2b   | 54.06   | 88.47   | 45.93   | 0.0016  | 0.0021  | 0.0006  | 0.82 |
| Shf        | 53.15   | 204.84  | 133.89  | < 2e-16 | < 2e-16 | 0.0002  | 1.13 |
| Slc30a1    | 86.12   | 212.83  | 114.32  | 0.0001  | < 2e-16 | 0.0001  | 1.09 |
| Slit2      | 92.82   | 285.07  | 122.99  | < 2e-16 | 0.0002  | 0.0001  | 1.40 |
| Smarca2    | 69.57   | 129.69  | 78.50   | 0.0008  | 0.0003  | 0.0011  | 0.81 |
| Socs7      | 17.06   | 35.21   | 22.15   | 0.0025  | 0.0018  | 0.0148  | 0.84 |
| Sp5        | 35.61   | 2231.24 | 445.80  | < 2e-16 | < 2e-16 | < 2e-16 | 3.21 |
| Spink3     | 159.82  | 776.55  | 114.32  | 0.0019  | 0.0018  | 0.0009  | 2.50 |
| St6galnac2 | 181.35  | 422.75  | 204.05  | < 2e-16 | < 2e-16 | < 2e-16 | 1.13 |
| Tap2       | 43.81   | 90.54   | 48.54   | 0.0080  | 0.0050  | 0.0083  | 0.97 |
| Tex19.1    | 1248.43 | 1970.28 | 1240.37 | 0.0011  | 0.0008  | 0.0004  | 0.66 |
| Thbs2      | 90.66   | 318.81  | 88.17   | 0.0382  | 0.0240  | 0.0247  | 1.83 |
| Tinagl     | 21.05   | 39.36   | 22.29   | 0.0019  | 0.0012  | 0.0013  | 0.86 |
| Tmem176b   | 41.77   | 71.52   | 32.37   | 0.0017  | 0.0022  | 0.0006  | 0.95 |
| Tmem97     | 968.24  | 1817.11 | 1181.06 | < 2e-16 | < 2e-16 | < 2e-16 | 0.76 |
| Trib2      | 119.36  | 325.28  | 202.87  | < 2e-16 | < 2e-16 | < 2e-16 | 1.01 |
| Tubd1      | 45.63   | 85.33   | 46.77   | 0.0050  | 0.0034  | 0.0041  | 0.89 |
| Zp3        | 56.34   | 183.50  | 97.09   | 0.0005  | 0.0001  | 0.0022  | 1.26 |

## Down-regulated genes (115)

| Gene          | Average Expression Value |         |          | BT-ANOVA P-value | Contrast P-value (iPSC) |           | Log2 Fold Changes |
|---------------|--------------------------|---------|----------|------------------|-------------------------|-----------|-------------------|
|               | AH-iPSC                  | HB-iPSC | MEF-iPSC |                  | AH vs HB                | HB vs MEF |                   |
| 1500003O03Rik | 38.45                    | 21.45   | 37.17    | 0.0034           | 0.0019                  | 0.0027    | -0.82             |
| 1700019D03Rik | 1528.93                  | 815.07  | 1983.87  | 0.0001           | 0.0001                  | < 2e-16   | -1.11             |
| 2610318N02Rik | 194.84                   | 77.90   | 164.52   | 0.0015           | 0.0004                  | 0.002     | -1.21             |
| 4632404H12Rik | 19.97                    | 8.93    | 20.19    | 0.0304           | 0.0219                  | 0.0192    | -1.17             |
| 4930424G05Rik | 61.25                    | 30.67   | 54.14    | 0.0438           | 0.0137                  | 0.0416    | -0.91             |
| A230107C01Rik | 88.10                    | 57.53   | 103.07   | 0.0141           | 0.0309                  | 0.0058    | -0.73             |
| A930024E05Rik | 38.24                    | 18.06   | 34.76    | 0.0134           | 0.0065                  | 0.0184    | -1.02             |
| Acss1         | 990.41                   | 478.15  | 940.50   | 0.0001           | 0.0001                  | 0.0001    | -1.01             |
| Adam32        | 35.14                    | 18.99   | 38.45    | 0.0412           | 0.0309                  | 0.0148    | -0.95             |
| Ahnak2        | 242.22                   | 139.62  | 223.09   | 0.0260           | 0.0122                  | 0.0317    | -0.74             |
| Aldh3b1       | 53.93                    | 16.67   | 29.50    | < 2e-16          | < 2e-16                 | 0.0074    | -1.32             |
| Ankrd12       | 98.51                    | 55.86   | 151.36   | 0.0005           | 0.0112                  | 0.0001    | -1.16             |
| Ankrd35       | 396.16                   | 122.00  | 183.23   | < 2e-16          | < 2e-16                 | 0.0162    | -1.25             |
| Ankrd56       | 99.18                    | 36.40   | 73.24    | < 2e-16          | < 2e-16                 | < 2e-16   | -1.24             |
| Apoe          | 6596.25                  | 3776.76 | 5736.12  | 0.0007           | 0.0002                  | 0.0028    | -0.71             |
| Aqp3          | 301.17                   | 144.20  | 561.31   | 0.0001           | 0.0007                  | < 2e-16   | -1.58             |
| Arhgap9       | 163.70                   | 47.48   | 78.98    | 0.000            | < 2e-16                 | 0.0112    | -1.35             |
| Arhgef19      | 160.07                   | 65.81   | 106.07   | 0.0008           | 0.0003                  | 0.0255    | -1.02             |
| AU023871      | 72.00                    | 41.54   | 71.12    | 0.0014           | 0.0012                  | 0.0012    | -0.78             |
| B230219D22Rik | 937.72                   | 516.22  | 777.80   | 0.0020           | 0.0004                  | 0.0096    | -0.73             |
| B230373P09Rik | 216.89                   | 68.47   | 140.19   | < 2e-16          | < 2e-16                 | 0.0004    | -1.38             |
| B930041F14Rik | 977.31                   | 336.76  | 624.97   | < 2e-16          | < 2e-16                 | 0.0015    | -1.25             |
| BC016495      | 126.52                   | 79.41   | 138.26   | 0.0119           | 0.0139                  | 0.0054    | -0.74             |
| Bdh2          | 639.28                   | 299.66  | 530.22   | 0.0002           | < 2e-16                 | 0.0010    | -0.96             |
| Btbd11        | 492.81                   | 221.09  | 377.59   | < 2e-16          | < 2e-16                 | < 2e-16   | -0.98             |
| C80008        | 52.16                    | 27.56   | 49.78    | 0.0004           | 0.0003                  | 0.0003    | -0.89             |
| Camk1         | 134.70                   | 76.50   | 120.59   | 0.0209           | 0.0092                  | 0.0331    | -0.74             |
| Cbr3          | 697.33                   | 368.59  | 662.47   | 0.0017           | 0.0005                  | 0.0017    | -0.88             |
| Cds2          | 50.65                    | 29.31   | 48.27    | 0.0194           | 0.0099                  | 0.0150    | -0.75             |
| Chrna4        | 34.70                    | 14.88   | 24.04    | 0.0048           | 0.0024                  | 0.0187    | -0.98             |
| Col9a2        | 246.58                   | 163.70  | 277.40   | < 2e-16          | 0.0004                  | < 2e-16   | -0.68             |
| Cox6b2        | 802.35                   | 304.01  | 585.13   | < 2e-16          | < 2e-16                 | 0.0003    | -1.19             |
| Cplx1         | 159.66                   | 29.15   | 57.34    | < 2e-16          | < 2e-16                 | 0.0077    | -1.90             |
| Cpt1b         | 47.17                    | 16.61   | 36.35    | 0.0137           | 0.0090                  | 0.0338    | -1.33             |
| Ctsa          | 385.85                   | 152.54  | 258.13   | 0.0001           | < 2e-16                 | 0.0027    | -1.08             |
| Cyp27a1       | 34.50                    | 13.75   | 29.12    | 0.0144           | 0.005                   | 0.029     | -1.21             |
| D630023F18Rik | 140.73                   | 80.89   | 132.31   | 0.0088           | 0.0051                  | 0.0123    | -0.76             |
| Dak           | 147.12                   | 79.66   | 128.41   | 0.0250           | 0.0087                  | 0.0475    | -0.79             |

|              |         |         |         |         |         |         |       |
|--------------|---------|---------|---------|---------|---------|---------|-------|
| Depdc6       | 247.18  | 134.59  | 223.34  | 0.0094  | 0.0042  | 0.0156  | -0.81 |
| Dnaic1       | 59.85   | 16.51   | 39.89   | 0.0013  | 0.0004  | 0.0088  | -1.59 |
| Dnase2a      | 130.27  | 70.80   | 115.09  | 0.0008  | 0.0003  | 0.0008  | -0.79 |
| Dpp7         | 2651.27 | 1665.48 | 3327.40 | < 2e-16 | 0.0001  | < 2e-16 | -0.84 |
| Entpd2       | 123.08  | 49.40   | 97.59   | 0.0084  | 0.0028  | 0.0229  | -1.16 |
| Faah         | 52.73   | 13.68   | 27.79   | 0.0001  | < 2e-16 | 0.012   | -1.56 |
| Fahd1        | 442.64  | 187.51  | 296.02  | 0.0001  | < 2e-16 | 0.0086  | -0.98 |
| Fam129a      | 150.09  | 58.29   | 106.89  | 0.0010  | 0.0003  | 0.0071  | -1.14 |
| Fbxo2        | 807.34  | 233.50  | 520.12  | < 2e-16 | < 2e-16 | < 2e-16 | -1.51 |
| Fbxo44       | 112.36  | 54.41   | 100.56  | 0.0018  | 0.0009  | 0.0022  | -0.97 |
| Fgf15        | 154.97  | 62.91   | 162.65  | < 2e-16 | < 2e-16 | < 2e-16 | -1.34 |
| Flywch2      | 556.69  | 348.66  | 539.06  | 0.0002  | 0.0002  | 0.0002  | -0.65 |
| Frs3         | 125.19  | 59.96   | 120.34  | 0.0026  | 0.0013  | 0.0014  | -1.03 |
| Fxyd6        | 2917.97 | 1486.11 | 3385.23 | < 2e-16 | < 2e-16 | < 2e-16 | -1.08 |
| Garnl3       | 512.24  | 233.32  | 355.52  | 0.0001  | < 2e-16 | 0.0060  | -0.89 |
| Gdf15        | 195.38  | 55.82   | 107.81  | < 2e-16 | < 2e-16 | 0.0038  | -1.44 |
| Gpt2         | 461.04  | 259.01  | 407.18  | 0.0005  | 0.0001  | 0.0018  | -0.75 |
| Grasp        | 893.78  | 405.97  | 614.11  | < 2e-16 | < 2e-16 | 0.0001  | -0.89 |
| Gsta4        | 2872.56 | 1786.92 | 2718.22 | 0.0048  | 0.0025  | 0.0063  | -0.65 |
| Gys1         | 72.19   | 30.24   | 67.16   | 0.0348  | 0.015   | 0.033   | -1.20 |
| H2afj        | 249.15  | 95.29   | 156.91  | 0.0005  | 0.0001  | 0.0296  | -1.09 |
| Hcn3         | 32.24   | 19.25   | 35.00   | 0.0164  | 0.0217  | 0.0082  | -0.80 |
| Hebp2        | 61.06   | 35.30   | 75.52   | 0.0003  | 0.0008  | 0.0001  | -0.95 |
| Hpcal1       | 102.93  | 50.68   | 76.94   | 0.0012  | 0.0005  | 0.0219  | -0.83 |
| Htatif2      | 491.66  | 243.03  | 455.67  | 0.0001  | < 2e-16 | < 2e-16 | -0.96 |
| Ifi30        | 605.02  | 267.36  | 522.88  | 0.001   | 0.0010  | 0.0030  | -1.08 |
| Ifitm5       | 57.61   | 28.66   | 48.68   | 0.0009  | 0.0003  | 0.0020  | -0.89 |
| Insl6        | 249.00  | 126.32  | 222.70  | 0.0012  | 0.0004  | 0.0024  | -0.90 |
| Iqgap2       | 411.43  | 214.61  | 339.23  | 0.0005  | < 2e-16 | 0.0028  | -0.81 |
| Itga6        | 183.04  | 107.31  | 164.16  | 0.0040  | 0.0014  | 0.0088  | -0.69 |
| Letmd1       | 69.64   | 43.96   | 67.46   | 0.0157  | 0.0091  | 0.0154  | -0.64 |
| LOC100045403 | 222.37  | 90.42   | 147.98  | < 2e-16 | < 2e-16 | 0.0044  | -1.03 |
| Lsm14b       | 148.16  | 96.51   | 146.95  | 0.0292  | 0.0194  | 0.0184  | -0.61 |
| Mdk          | 3077.42 | 1311.97 | 2210.83 | < 2e-16 | < 2e-16 | < 2e-16 | -1.01 |
| Mef2b        | 104.80  | 57.57   | 118.44  | 0.0014  | 0.0027  | 0.0008  | -0.96 |
| Mical1       | 148.15  | 51.05   | 102.73  | 0.0001  | 0.0001  | 0.0105  | -1.30 |
| Mocos        | 173.19  | 78.27   | 143.86  | < 2e-16 | < 2e-16 | < 2e-16 | -1.02 |
| Mreg         | 3456.98 | 1791.30 | 2728.44 | < 2e-16 | < 2e-16 | 0.0001  | -0.79 |
| Muc1         | 29.73   | 18.13   | 27.36   | 0.0139  | 0.0057  | 0.0171  | -0.66 |
| Myo6         | 588.79  | 266.20  | 509.41  | < 2e-16 | < 2e-16 | < 2e-16 | -1.04 |
| Nagk         | 184.52  | 71.42   | 110.34  | < 2e-16 | < 2e-16 | 0.0030  | -1.05 |
| Nek8         | 107.42  | 62.58   | 103.46  | 0.0048  | 0.0021  | 0.0039  | -0.75 |
| Nupr1        | 583.04  | 251.68  | 810.41  | 0.0007  | 0.0045  | 0.0002  | -1.47 |

|           |         |         |         |         |         |         |       |
|-----------|---------|---------|---------|---------|---------|---------|-------|
| Pdgfc     | 262.42  | 71.18   | 143.91  | < 2e-16 | < 2e-16 | 0.002   | -1.51 |
| Pfkfb2    | 111.80  | 65.29   | 132.20  | 0.0053  | 0.0124  | 0.0022  | -0.90 |
| Pkn1      | 57.91   | 30.98   | 56.58   | 0.0068  | 0.0043  | 0.0041  | -0.89 |
| Plcd1     | 579.95  | 320.61  | 505.49  | 0.0011  | 0.0004  | 0.0032  | -0.76 |
| Plk2      | 168.28  | 86.43   | 137.83  | 0.0132  | 0.0058  | 0.0323  | -0.82 |
| Ppapdc2   | 76.39   | 21.64   | 39.23   | 0.0001  | < 2e-16 | 0.0210  | -1.42 |
| Ppfibp2   | 135.51  | 77.87   | 117.33  | 0.0008  | 0.0003  | 0.0024  | -0.70 |
| Ptprk     | 731.22  | 418.95  | 738.05  | < 2e-16 | < 2e-16 | < 2e-16 | -0.81 |
| Rad9b     | 297.55  | 120.89  | 222.79  | 0.0001  | < 2e-16 | 0.0002  | -1.11 |
| Raet1b    | 248.52  | 135.05  | 240.43  | < 2e-16 | < 2e-16 | 0.0001  | -0.86 |
| Rassf4    | 104.47  | 12.93   | 22.33   | < 2e-16 | < 2e-16 | 0.0087  | -2.29 |
| Rgs9bp    | 184.29  | 88.55   | 173.62  | 0.0001  | 0.0001  | 0.0002  | -1.01 |
| Rims3     | 312.10  | 194.80  | 319.29  | 0.0010  | 0.0008  | 0.0003  | -0.70 |
| Sct       | 199.46  | 43.80   | 99.51   | < 2e-16 | < 2e-16 | 0.0047  | -1.77 |
| Serpinb6c | 1386.59 | 238.33  | 423.16  | < 2e-16 | < 2e-16 | 0.0278  | -1.92 |
| Slc25a33  | 1338.05 | 786.66  | 1259.34 | 0.0006  | 0.0003  | 0.0003  | -0.72 |
| Slc25a37  | 171.73  | 88.26   | 152.85  | 0.0022  | 0.0011  | 0.0033  | -0.88 |
| Slc29a4   | 408.40  | 202.47  | 324.06  | 0.0002  | 0.0002  | 0.0015  | -0.86 |
| Smox      | 262.91  | 148.77  | 245.05  | 0.0002  | < 2e-16 | < 2e-16 | -0.77 |
| Spock2    | 59.40   | 31.46   | 52.68   | 0.0225  | 0.0082  | 0.0326  | -0.83 |
| Spsb1     | 306.20  | 71.60   | 182.83  | < 2e-16 | < 2e-16 | 0.0009  | -1.77 |
| Sv2a      | 81.29   | 44.80   | 84.61   | 0.0010  | 0.0010  | 0.0007  | -0.89 |
| Syt9      | 532.25  | 318.33  | 498.37  | < 2e-16 | < 2e-16 | 0.0001  | -0.69 |
| Tcl1      | 1446.14 | 462.51  | 840.29  | < 2e-16 | < 2e-16 | 0.0001  | -1.31 |
| Tmem118   | 201.18  | 75.82   | 166.79  | 0.0010  | 0.0004  | 0.0015  | -1.28 |
| Tmem16j   | 1876.78 | 564.33  | 893.97  | < 2e-16 | < 2e-16 | 0.0084  | -1.30 |
| Trp53i11  | 52.01   | 16.82   | 42.83   | 0.0002  | 0.0001  | 0.0003  | -1.49 |
| Usp2      | 151.57  | 70.57   | 126.63  | 0.0011  | 0.0002  | 0.0051  | -0.98 |
| Whrn      | 230.48  | 101.37  | 215.47  | 0.0003  | < 2e-16 | 0.0003  | -1.14 |
| Wscd1     | 94.98   | 43.22   | 112.08  | 0.0189  | 0.0285  | 0.0077  | -1.26 |
| Zcwpw1    | 93.09   | 55.88   | 90.31   | 0.0011  | 0.0012  | 0.0017  | -0.71 |
| Zfp385c   | 71.38   | 21.28   | 46.67   | 0.0017  | 0.0004  | 0.0159  | -1.47 |
| Zfp655    | 1712.77 | 1104.37 | 1736.11 | < 2e-16 | < 2e-16 | < 2e-16 | -0.64 |
| Zmat4     | 225.59  | 38.94   | 80.81   | < 2e-16 | < 2e-16 | 0.0402  | -1.98 |



**Supporting Information Table S3.** Unique donor memory genes in HB-iPSC.

Up-regulated genes (62)

| Gene          | Average Expression Value |         |        | BT-ANOVA<br>P-value | Contrast P-value |            | Log2<br>Fold<br>Changes |
|---------------|--------------------------|---------|--------|---------------------|------------------|------------|-------------------------|
|               | HB-iPSC                  | HB      | mESC   |                     | HB-iPSC vs mESC  | HB vs mESC |                         |
| 1700019H03Rik | 492.43                   | 471.50  | 232.35 | 0.0002              | 0.0002           | 0.0003     | 1.05                    |
| 2610207I05Rik | 1342.01                  | 1419.50 | 598.09 | 0.0002              | 0.0001           | 0.0001     | 1.21                    |
| 4930432O21Rik | 113.08                   | 226.13  | 54.90  | 0.0005              | 0.0187           | 0.0001     | 1.63                    |
| 5830427D03Rik | 55.30                    | 65.11   | 26.48  | 0.0132              | 0.0196           | 0.0048     | 1.18                    |
| 5930434B04Rik | 85.66                    | 263.45  | 38.74  | 0.0001              | 0.0099           | 0.0001     | 2.17                    |
| Acsf3         | 172.07                   | 370.86  | 78.82  | < 2e-16             | 0.0006           | < 2e-16    | 1.78                    |
| Agpat3        | 188.86                   | 293.11  | 86.93  | 0.0006              | 0.0179           | < 2e-16    | 1.47                    |
| Angptl2       | 43.49                    | 50.55   | 18.57  | 0.0017              | 0.0009           | 0.0016     | 1.34                    |
| Car14         | 266.46                   | 1532.90 | 34.56  | < 2e-16             | 0.0180           | < 2e-16    | 4.70                    |
| Ccdc28b       | 152.15                   | 235.91  | 73.91  | < 2e-16             | < 2e-16          | < 2e-16    | 1.39                    |
| Cebpb         | 1206.88                  | 7241.52 | 574.67 | < 2e-16             | 0.0449           | < 2e-16    | 2.88                    |
| Cldn3         | 155.26                   | 191.65  | 49.22  | 0.0055              | 0.0132           | 0.0021     | 1.82                    |
| Cnksr3        | 70.56                    | 118.73  | 33.93  | 0.0014              | 0.0312           | 0.0006     | 1.48                    |
| D5Wsu178e     | 400.40                   | 715.31  | 185.94 | 0.0002              | 0.0156           | < 2e-16    | 1.59                    |
| D930015E06Rik | 292.77                   | 334.33  | 143.48 | < 2e-16             | 0.0001           | < 2e-16    | 1.13                    |
| Dab2          | 76.00                    | 112.99  | 31.45  | 0.0019              | 0.0135           | 0.0007     | 1.59                    |
| Emilin1       | 86.12                    | 218.62  | 41.17  | < 2e-16             | 0.0143           | < 2e-16    | 1.89                    |
| Epha1         | 216.31                   | 324.76  | 40.67  | < 2e-16             | 0.0002           | < 2e-16    | 2.73                    |
| Ephb4         | 50.93                    | 51.92   | 25.07  | 0.0059              | 0.0046           | 0.0035     | 1.04                    |
| Esd           | 332.49                   | 718.05  | 160.90 | < 2e-16             | 0.0016           | < 2e-16    | 1.71                    |
| Espn          | 252.46                   | 225.45  | 74.27  | < 2e-16             | < 2e-16          | < 2e-16    | 1.69                    |
| Fbxo21        | 1657.86                  | 1738.04 | 747.62 | 0.0002              | 0.0001           | 0.0001     | 1.18                    |
| Ghr           | 117.43                   | 1701.12 | 24.47  | < 2e-16             | 0.0346           | < 2e-16    | 5.22                    |
| Glipr2        | 716.77                   | 1136.61 | 262.67 | < 2e-16             | 0.0011           | < 2e-16    | 1.82                    |
| H13           | 220.47                   | 743.43  | 55.31  | < 2e-16             | 0.0023           | < 2e-16    | 3.12                    |
| H47           | 1608.24                  | 6008.10 | 783.69 | < 2e-16             | 0.0066           | < 2e-16    | 2.28                    |
| Hgsnat        | 1252.93                  | 2890.95 | 575.42 | < 2e-16             | 0.0006           | < 2e-16    | 1.85                    |
| Inpp5e        | 135.62                   | 160.49  | 62.10  | 0.0014              | 0.0024           | 0.0004     | 1.25                    |
| Irf1          | 1316.51                  | 2394.52 | 516.81 | < 2e-16             | < 2e-16          | < 2e-16    | 1.84                    |
| Lars2         | 500.22                   | 552.29  | 247.86 | 0.0003              | 0.0006           | 0.0003     | 1.09                    |
| Lman2l        | 522.10                   | 577.99  | 245.25 | < 2e-16             | < 2e-16          | < 2e-16    | 1.17                    |
| LOC100044170  | 185.19                   | 210.19  | 79.77  | 0.0006              | 0.0006           | 0.0003     | 1.31                    |
| LOC100044190  | 166.30                   | 543.89  | 60.02  | < 2e-16             | 0.0005           | < 2e-16    | 2.56                    |
| LOC100046056  | 305.31                   | 398.84  | 149.84 | 0.0007              | 0.0062           | 0.0001     | 1.23                    |
| Lrig1         | 425.82                   | 947.17  | 190.86 | < 2e-16             | 0.0094           | < 2e-16    | 1.85                    |
| Mad1l1        | 168.31                   | 178.29  | 78.25  | 0.0011              | 0.0011           | 0.0007     | 1.15                    |

|         |         |         |        |         |         |         |      |
|---------|---------|---------|--------|---------|---------|---------|------|
| Maml1   | 125.22  | 141.60  | 43.93  | 0.0016  | 0.0028  | 0.0004  | 1.60 |
| Mgat4b  | 581.16  | 742.42  | 269.96 | 0.0003  | 0.0023  | < 2e-16 | 1.29 |
| Mmp15   | 90.19   | 83.01   | 27.89  | 0.0290  | 0.0097  | 0.0178  | 1.63 |
| Nt5e    | 194.12  | 1241.85 | 54.42  | < 2e-16 | 0.0248  | < 2e-16 | 3.72 |
| Pcsk4   | 42.68   | 97.53   | 20.13  | < 2e-16 | 0.0131  | < 2e-16 | 1.80 |
| Ppp4r4  | 145.12  | 123.93  | 29.06  | 0.0003  | 0.0001  | 0.0002  | 2.21 |
| Prss8   | 247.22  | 1457.00 | 111.27 | < 2e-16 | 0.0004  | < 2e-16 | 2.94 |
| Pycrl   | 1118.44 | 1510.55 | 547.68 | 0.0013  | 0.0039  | 0.0005  | 1.26 |
| Rbm15   | 258.28  | 341.13  | 91.66  | 0.0004  | 0.0026  | 0.0001  | 1.71 |
| Reep3   | 656.69  | 1623.42 | 309.86 | 0.0001  | 0.0090  | < 2e-16 | 1.88 |
| Rffl    | 205.40  | 123.54  | 54.26  | < 2e-16 | < 2e-16 | 0.0009  | 1.60 |
| Rnf135  | 275.33  | 241.69  | 103.70 | < 2e-16 | < 2e-16 | 0.0004  | 1.32 |
| Rrbp1   | 605.02  | 4842.92 | 256.06 | < 2e-16 | 0.0006  | < 2e-16 | 3.41 |
| Scd2    | 486.58  | 801.48  | 196.60 | < 2e-16 | 0.0007  | < 2e-16 | 1.71 |
| Slc12a7 | 224.28  | 237.11  | 107.74 | 0.0035  | 0.0034  | 0.0021  | 1.10 |
| Slc27a2 | 720.55  | 4665.82 | 110.52 | < 2e-16 | < 2e-16 | < 2e-16 | 4.61 |
| Slc4a2  | 720.83  | 1075.54 | 278.57 | 0.0002  | 0.0015  | 0.0001  | 1.69 |
| Smarca2 | 129.69  | 350.24  | 48.38  | < 2e-16 | 0.0005  | < 2e-16 | 2.31 |
| Snx9    | 125.80  | 244.31  | 52.56  | 0.0002  | 0.0256  | 0.0001  | 1.82 |
| Srpr    | 1191.48 | 1443.19 | 569.42 | 0.0001  | 0.0003  | < 2e-16 | 1.21 |
| Tgfb1   | 211.23  | 373.56  | 69.77  | 0.0014  | 0.0318  | 0.0008  | 2.07 |
| Trappc5 | 36.32   | 37.56   | 10.98  | 0.0196  | 0.0117  | 0.0113  | 1.75 |
| Trub1   | 565.70  | 349.70  | 169.36 | < 2e-16 | < 2e-16 | < 2e-16 | 1.43 |
| Tsc22d4 | 149.80  | 192.48  | 67.21  | 0.0082  | 0.0242  | 0.0024  | 1.35 |
| Ttyh3   | 130.81  | 271.96  | 24.75  | < 2e-16 | 0.0084  | < 2e-16 | 3.02 |
| Vldlr   | 119.60  | 328.95  | 35.33  | < 2e-16 | 0.0003  | < 2e-16 | 2.67 |

## Down-regulated genes (142)

| Gene          | Average Expression Value |         |         | BT-ANOVA<br>P-value | Contrast P-value   |            | Log2<br>Fold<br>Changes |
|---------------|--------------------------|---------|---------|---------------------|--------------------|------------|-------------------------|
|               | HB-iPSC                  | HB      | mESC    |                     | HB-iPSC vs<br>mESC | HB vs mESC |                         |
| 1110032E23Rik | 97.56                    | 55.76   | 287.55  | < 2e-16             | < 2e-16            | < 2e-16    | -1.91                   |
| 1700025K23Rik | 76.54                    | 32.49   | 156.35  | 0.0008              | 0.0011             | 0.0002     | -1.52                   |
| 2200001I15Rik | 127.27                   | 48.78   | 4278.50 | 0.0002              | 0.0001             | 0.0002     | -5.60                   |
| 2210016L21Rik | 67.95                    | 40.71   | 166.11  | 0.0008              | 0.0007             | 0.0002     | -1.61                   |
| 2410137M14Rik | 152.28                   | 26.84   | 638.95  | < 2e-16             | < 2e-16            | < 2e-16    | -2.83                   |
| 2610318N02Rik | 77.90                    | 31.33   | 165.04  | 0.0005              | 0.0004             | 0.0002     | -1.60                   |
| 2610524H06Rik | 174.11                   | 41.43   | 442.89  | 0.0001              | 0.0004             | < 2e-16    | -2.04                   |
| 4632417K18Rik | 210.67                   | 130.19  | 583.81  | 0.0002              | 0.0002             | 0.0001     | -1.78                   |
| A330080J22Rik | 65.19                    | 35.46   | 135.72  | 0.0051              | 0.0105             | 0.0018     | -1.43                   |
| Adprh         | 2710.74                  | 2268.96 | 6632.62 | < 2e-16             | < 2e-16            | < 2e-16    | -1.41                   |
| Agpat4        | 606.94                   | 92.70   | 1563.85 | < 2e-16             | < 2e-16            | < 2e-16    | -2.16                   |
| Amd2          | 73.13                    | 65.56   | 185.04  | 0.0005              | 0.0005             | 0.0003     | -1.42                   |
| Amhr2         | 84.19                    | 19.96   | 210.11  | 0.0003              | 0.0002             | 0.0003     | -2.01                   |
| Ankrd12       | 55.86                    | 45.72   | 154.39  | 0.0015              | 0.0014             | 0.0010     | -1.60                   |
| Apob48r       | 23.12                    | 21.92   | 65.47   | 0.0001              | 0.0001             | < 2e-16    | -1.54                   |
| Apobec1       | 46.06                    | 64.69   | 257.46  | 0.0001              | 0.0001             | 0.0001     | -2.22                   |
| Aqp3          | 144.20                   | 131.39  | 478.46  | 0.0030              | 0.0020             | 0.0023     | -1.80                   |
| Arhgap30      | 134.80                   | 66.23   | 348.36  | 0.0001              | 0.0002             | 0.0001     | -1.79                   |
| Arhgap8       | 238.51                   | 27.95   | 520.30  | 0.0028              | 0.0090             | 0.0016     | -1.97                   |
| B930041F14Rik | 336.76                   | 35.71   | 1331.64 | < 2e-16             | < 2e-16            | < 2e-16    | -2.84                   |
| Bbx           | 50.67                    | 51.74   | 152.50  | 0.0064              | 0.0051             | 0.0048     | -1.57                   |
| BC004701      | 108.48                   | 66.13   | 224.20  | 0.0002              | 0.0002             | < 2e-16    | -1.36                   |
| BC031575      | 38.44                    | 29.70   | 94.07   | 0.0026              | 0.0025             | 0.0026     | -1.47                   |
| Calca         | 114.86                   | 24.40   | 464.75  | 0.0051              | 0.0041             | 0.0037     | -2.74                   |
| Camk2b        | 302.00                   | 101.65  | 702.58  | < 2e-16             | < 2e-16            | < 2e-16    | -1.80                   |
| Car13         | 187.83                   | 37.08   | 512.72  | < 2e-16             | < 2e-16            | < 2e-16    | -2.19                   |
| Cbr3          | 368.59                   | 21.98   | 1044.03 | < 2e-16             | < 2e-16            | < 2e-16    | -2.42                   |
| Cd55          | 24.11                    | 37.47   | 80.32   | 0.0310              | 0.0170             | 0.0472     | -1.38                   |
| Cd68          | 223.62                   | 100.80  | 497.61  | 0.0004              | 0.0032             | 0.0001     | -1.62                   |
| Cdkn1a        | 458.91                   | 507.86  | 1102.11 | < 2e-16             | < 2e-16            | < 2e-16    | -1.19                   |
| Cecr5         | 123.90                   | 104.70  | 275.14  | 0.0001              | 0.0003             | < 2e-16    | -1.27                   |
| Cep63         | 37.06                    | 37.89   | 84.99   | 0.0015              | 0.0009             | 0.0017     | -1.18                   |
| Chd5          | 27.70                    | 26.76   | 70.17   | 0.0135              | 0.0102             | 0.0096     | -1.37                   |
| Cib2          | 30.92                    | 23.89   | 73.46   | 0.0273              | 0.0349             | 0.0122     | -1.42                   |
| Cmtm7         | 242.85                   | 108.62  | 815.82  | 0.0007              | 0.0006             | 0.0005     | -2.21                   |
| Col9a2        | 163.70                   | 39.70   | 345.38  | 0.0003              | 0.0010             | 0.0002     | -1.76                   |
| Coro2b        | 23.94                    | 18.56   | 63.21   | 0.0014              | 0.0011             | 0.0008     | -1.57                   |
| Cox6b2        | 304.01                   | 49.77   | 915.10  | < 2e-16             | < 2e-16            | < 2e-16    | -2.37                   |

|              |          |          |          |         |         |         |       |
|--------------|----------|----------|----------|---------|---------|---------|-------|
| Crtac1       | 123.39   | 24.32    | 448.92   | 0.0019  | 0.0011  | 0.0016  | -2.60 |
| Ctsa         | 152.54   | 135.94   | 319.96   | 0.0017  | 0.0016  | 0.0009  | -1.15 |
| Cxcl16       | 42.62    | 47.04    | 121.60   | 0.0137  | 0.0083  | 0.0103  | -1.44 |
| D12Ertd647e  | 234.52   | 153.25   | 7174.47  | < 2e-16 | < 2e-16 | < 2e-16 | -5.21 |
| D9Ertd392e   | 347.55   | 396.77   | 960.44   | 0.0001  | < 2e-16 | 0.0001  | -1.37 |
| Ddit4l       | 215.80   | 83.91    | 813.58   | < 2e-16 | < 2e-16 | < 2e-16 | -2.44 |
| Def6         | 189.30   | 35.62    | 421.68   | < 2e-16 | 0.0001  | < 2e-16 | -1.91 |
| Des          | 70.17    | 34.60    | 161.45   | 0.0117  | 0.0132  | 0.0080  | -1.62 |
| Dnajb13      | 37.65    | 29.71    | 77.95    | 0.0020  | 0.0011  | 0.0016  | -1.21 |
| Dscr1l2      | 402.33   | 105.59   | 953.52   | < 2e-16 | < 2e-16 | < 2e-16 | -1.91 |
| Eda2r        | 35.17    | 30.35    | 79.49    | 0.0204  | 0.0170  | 0.0104  | -1.28 |
| Efr3a        | 154.90   | 102.83   | 374.90   | < 2e-16 | < 2e-16 | < 2e-16 | -1.54 |
| Eif2ak2      | 222.12   | 277.73   | 748.20   | 0.0005  | 0.0003  | 0.0003  | -1.58 |
| Elk3         | 67.00    | 24.87    | 201.92   | < 2e-16 | < 2e-16 | < 2e-16 | -2.14 |
| Eng          | 120.26   | 45.70    | 337.41   | 0.0001  | 0.0004  | 0.0001  | -2.02 |
| Ephx1        | 310.02   | 344.34   | 1129.18  | 0.0006  | 0.0004  | 0.0004  | -1.79 |
| Ercc5        | 573.79   | 395.56   | 1553.77  | < 2e-16 | < 2e-16 | < 2e-16 | -1.68 |
| Evi5l        | 37.59    | 36.01    | 91.84    | 0.0002  | 0.0003  | 0.0004  | -1.32 |
| Exoc4        | 519.82   | 184.48   | 1308.11  | < 2e-16 | 0.0001  | < 2e-16 | -1.89 |
| Fcho1        | 353.23   | 31.30    | 973.05   | < 2e-16 | < 2e-16 | < 2e-16 | -2.34 |
| Flywch2      | 348.66   | 36.79    | 815.44   | 0.0017  | 0.0008  | 0.0014  | -2.08 |
| Frs3         | 59.96    | 36.20    | 227.90   | < 2e-16 | < 2e-16 | < 2e-16 | -2.24 |
| Gab3         | 14.02    | 11.27    | 56.82    | 0.0018  | 0.0007  | 0.0021  | -2.17 |
| Gna12        | 53.86    | 55.95    | 122.07   | 0.0458  | 0.0344  | 0.0276  | -1.15 |
| Gspt2        | 555.42   | 45.20    | 1148.65  | < 2e-16 | 0.0002  | < 2e-16 | -1.94 |
| H2-Ab1       | 28.22    | 66.37    | 189.29   | 0.0065  | 0.0021  | 0.0135  | -2.00 |
| Hdac8        | 55.47    | 27.82    | 133.28   | < 2e-16 | < 2e-16 | < 2e-16 | -1.68 |
| Hist1h2ag    | 802.22   | 642.10   | 2317.06  | 0.0003  | 0.0004  | 0.0001  | -1.68 |
| Hist2h2ac    | 14718.02 | 10738.18 | 31560.69 | < 2e-16 | < 2e-16 | < 2e-16 | -1.31 |
| Hnrnp3       | 47.23    | 54.81    | 144.94   | 0.0020  | 0.0014  | 0.0018  | -1.51 |
| Hyal1        | 35.34    | 33.69    | 175.83   | 0.0001  | 0.0002  | 0.0002  | -2.35 |
| Inpp5d       | 41.28    | 27.34    | 131.07   | 0.0002  | 0.0002  | 0.0001  | -1.93 |
| Irak1        | 36.01    | 33.59    | 75.17    | 0.0097  | 0.0062  | 0.0084  | -1.11 |
| Kat2b        | 29.38    | 32.92    | 71.30    | 0.0018  | 0.0008  | 0.0016  | -1.19 |
| Kdelr3       | 176.64   | 38.10    | 886.42   | 0.0001  | 0.0002  | 0.0001  | -3.05 |
| Laptm5       | 4041.65  | 1296.86  | 16911.72 | < 2e-16 | < 2e-16 | < 2e-16 | -2.66 |
| Lgals3       | 728.86   | 402.76   | 2930.73  | < 2e-16 | < 2e-16 | < 2e-16 | -2.37 |
| LOC100038882 | 51.93    | 53.84    | 164.64   | 0.0020  | 0.0012  | 0.0023  | -1.64 |
| LOC100048056 | 21.96    | 20.34    | 45.50    | 0.0026  | 0.0035  | 0.0016  | -1.11 |
| LOC677317    | 155.49   | 170.85   | 382.67   | < 2e-16 | < 2e-16 | < 2e-16 | -1.23 |
| Max          | 51.53    | 33.45    | 146.95   | 0.0002  | 0.0002  | 0.0001  | -1.79 |
| Mgmt         | 121.45   | 84.35    | 271.39   | 0.0002  | 0.0001  | 0.0001  | -1.40 |
| Napsa        | 28.20    | 46.13    | 1010.64  | 0.0005  | 0.0003  | 0.0010  | -4.77 |

|           |         |         |         |         |         |         |       |
|-----------|---------|---------|---------|---------|---------|---------|-------|
| Nos3      | 26.96   | 27.66   | 79.27   | 0.0004  | 0.0001  | 0.0009  | -1.54 |
| Nptx2     | 487.63  | 63.99   | 1027.90 | 0.0005  | 0.0018  | 0.0004  | -1.90 |
| Nr5a2     | 99.20   | 127.32  | 285.64  | 0.0093  | 0.0056  | 0.0076  | -1.33 |
| Nup54     | 20.02   | 29.00   | 84.77   | 0.0038  | 0.0023  | 0.0035  | -1.79 |
| P2ry6     | 24.16   | 29.79   | 106.86  | 0.0012  | 0.0008  | 0.0007  | -1.99 |
| Phlda2    | 2426.40 | 2084.53 | 4871.05 | 0.0001  | < 2e-16 | 0.0001  | -1.11 |
| Pitpnc1   | 112.64  | 155.71  | 312.66  | 0.0059  | 0.0031  | 0.0094  | -1.22 |
| Piwil1    | 31.99   | 29.90   | 94.52   | 0.0029  | 0.0021  | 0.0015  | -1.61 |
| Plek2     | 36.45   | 33.21   | 82.05   | 0.0267  | 0.0158  | 0.0341  | -1.24 |
| Plekhb1   | 74.84   | 53.14   | 416.25  | < 2e-16 | < 2e-16 | < 2e-16 | -2.70 |
| Plekhb2   | 217.72  | 106.73  | 639.26  | 0.0004  | 0.0015  | 0.0001  | -1.98 |
| Plekhf1   | 81.64   | 27.65   | 178.23  | 0.0007  | 0.0006  | 0.0006  | -1.71 |
| Pltp      | 108.74  | 39.02   | 273.58  | 0.0016  | 0.0014  | 0.0011  | -1.89 |
| Pmaip1    | 142.73  | 27.86   | 291.49  | 0.0017  | 0.0013  | 0.0013  | -1.77 |
| Polh      | 76.67   | 60.87   | 194.23  | 0.0007  | 0.0006  | 0.0003  | -1.50 |
| Ppp2r5c   | 900.58  | 352.23  | 1998.72 | 0.0032  | 0.0048  | 0.0015  | -1.67 |
| Prei3     | 50.81   | 44.12   | 123.90  | 0.0027  | 0.0027  | 0.0017  | -1.38 |
| Prkcb     | 24.50   | 31.67   | 106.81  | 0.0125  | 0.0172  | 0.0090  | -1.93 |
| Pros1     | 449.05  | 545.42  | 1414.25 | < 2e-16 | < 2e-16 | 0.0002  | -1.51 |
| Prosc     | 74.15   | 40.82   | 166.56  | < 2e-16 | 0.0001  | < 2e-16 | -1.53 |
| Pstpip1   | 38.67   | 23.14   | 86.19   | 0.0040  | 0.0055  | 0.0032  | -1.48 |
| Ptp4a3    | 139.40  | 127.80  | 373.50  | 0.0001  | < 2e-16 | 0.0001  | -1.48 |
| Rab11fip5 | 121.33  | 38.51   | 436.36  | 0.0015  | 0.0012  | 0.0010  | -2.45 |
| Rab12     | 102.12  | 75.63   | 292.72  | < 2e-16 | < 2e-16 | < 2e-16 | -1.72 |
| Rab23     | 85.05   | 27.16   | 186.50  | 0.0002  | 0.0014  | < 2e-16 | -1.73 |
| Rad9b     | 120.89  | 35.58   | 309.58  | < 2e-16 | < 2e-16 | < 2e-16 | -1.98 |
| Rassf4    | 12.93   | 18.43   | 63.47   | 0.0069  | 0.0055  | 0.0080  | -2.02 |
| Rec8      | 215.77  | 34.28   | 516.63  | 0.0013  | 0.0048  | 0.0006  | -2.05 |
| Ribc1     | 122.76  | 44.33   | 290.70  | < 2e-16 | < 2e-16 | < 2e-16 | -1.80 |
| Rpl3l     | 45.55   | 35.91   | 142.44  | 0.0030  | 0.0021  | 0.0030  | -1.81 |
| Rsad2     | 27.17   | 45.22   | 226.24  | 0.0017  | 0.0009  | 0.0035  | -2.64 |
| S100a13   | 332.36  | 226.95  | 791.02  | 0.0004  | 0.0003  | 0.0002  | -1.50 |
| Senp1     | 62.65   | 36.62   | 147.01  | < 2e-16 | 0.0001  | < 2e-16 | -1.57 |
| Shisa2    | 97.45   | 35.82   | 347.31  | 0.0002  | 0.0001  | 0.0001  | -2.38 |
| Si        | 84.04   | 21.44   | 299.95  | 0.0027  | 0.0030  | 0.0016  | -2.51 |
| Slc25a30  | 38.19   | 29.70   | 77.66   | 0.0014  | 0.0022  | 0.0006  | -1.19 |
| Slc29a3   | 120.28  | 68.46   | 258.24  | < 2e-16 | 0.0001  | < 2e-16 | -1.45 |
| Slc38a5   | 78.40   | 181.17  | 1019.97 | 0.0001  | 0.0001  | < 2e-16 | -2.97 |
| Slc6a8    | 696.73  | 280.30  | 3118.09 | < 2e-16 | < 2e-16 | < 2e-16 | -2.67 |
| Slco4a1   | 142.84  | 56.99   | 290.22  | 0.0002  | 0.0001  | 0.0002  | -1.54 |
| Sntb2     | 85.87   | 55.92   | 175.60  | < 2e-16 | < 2e-16 | < 2e-16 | -1.31 |
| Spock2    | 31.46   | 22.92   | 66.88   | 0.0389  | 0.0457  | 0.0296  | -1.30 |
| Spsb1     | 71.60   | 59.95   | 671.71  | 0.0006  | 0.0002  | 0.0005  | -3.35 |

|           |         |         |         |         |         |         |       |
|-----------|---------|---------|---------|---------|---------|---------|-------|
| Srp54     | 55.27   | 136.08  | 349.56  | 0.0002  | 0.0001  | 0.0005  | -1.87 |
| Ssbp4     | 134.69  | 31.47   | 272.44  | < 2e-16 | < 2e-16 | < 2e-16 | -1.71 |
| Susd4     | 51.94   | 28.67   | 192.69  | 0.0014  | 0.0021  | 0.0012  | -2.26 |
| Tgs1      | 133.67  | 125.04  | 326.84  | 0.0001  | 0.0001  | 0.0001  | -1.34 |
| Tmem118   | 75.82   | 29.88   | 250.11  | 0.0001  | 0.0001  | < 2e-16 | -2.24 |
| Tmem16j   | 564.33  | 106.64  | 2234.50 | 0.0006  | 0.0004  | 0.0003  | -2.74 |
| Tmem39a   | 2970.29 | 1915.43 | 5966.47 | 0.0020  | 0.0043  | 0.0005  | -1.29 |
| Tnpo2     | 42.34   | 39.39   | 113.69  | < 2e-16 | < 2e-16 | < 2e-16 | -1.48 |
| Tpd52l1   | 112.31  | 17.45   | 229.03  | < 2e-16 | < 2e-16 | < 2e-16 | -1.82 |
| Tpmt      | 23.00   | 67.45   | 171.19  | 0.0009  | 0.0003  | 0.0018  | -1.92 |
| Trit1     | 142.02  | 146.28  | 297.63  | 0.0005  | 0.0003  | 0.0004  | -1.05 |
| Trp53inp1 | 1259.04 | 713.18  | 3071.38 | < 2e-16 | < 2e-16 | < 2e-16 | -1.64 |
| Trps1     | 33.62   | 38.73   | 90.72   | 0.0015  | 0.0009  | 0.0012  | -1.33 |
| Ube2e1    | 84.69   | 43.26   | 179.35  | 0.0006  | 0.0025  | 0.0001  | -1.49 |
| Vax2      | 27.74   | 29.40   | 103.73  | 0.0107  | 0.0068  | 0.0146  | -1.86 |
| Whrn      | 101.37  | 52.92   | 219.27  | 0.0002  | 0.0003  | 0.0001  | -1.51 |
| Wipi1     | 108.12  | 100.84  | 265.09  | 0.0036  | 0.0040  | 0.0027  | -1.34 |
| Zfp691    | 87.89   | 44.52   | 195.30  | 0.0005  | 0.0011  | 0.0001  | -1.56 |

---

SC-11-1037-R1

### Supporting Information Figure Legends

**Fig. S1. Loss of GFP expression after reprogramming.** Hepatic lineage cells (AH and HB) and MEF were transduced with pLentG-KOSM vector containing fusion of 4 genes, including KLF, Oct4, Sox2, Myc and GFP. The infected cells were cultured on feeder cells until appearance of ES-like cells which expressed GFP (P0). At passage 1 (P1), the reprogrammed cells lost GFP expression. Images were taken with original magnification,  $\times 100$ . iPS, induced pluripotent stem cells; HB-iPSC, hepatoblast-derived iPSC; AH-iPSC, adult hepatocyte-derived iPSC; MEF-iPSC, mouse embryonic fibroblast-derived iPSC.

**Fig. S2. Protocol development for induced differentiation of mES cells towards hepatocytes in monolayer without feeder cells.** (A) Schematic representation of the key factors required for differentiation of mES cells towards hepatic lineage cells. (B) The morphology and immunofluorescence staining of mESC with antibodies against pluripotency markers at passage 4. The cells were cultured on collagen-coated plates in mESC media containing a GSK3 inhibitor BIO (1 $\mu$ M). Scale bar, 20  $\mu$ M. (C) Phase-contrast micrograph ( $\times 200$ ). By day 25, the cells acquired a hepatocyte-like cells morphology and sporadic binuclearity (arrow). (D) Double immunofluorescence staining with AFP and Albumin at day 25. Scale bar, 20  $\mu$ M. (E) Quantitative reverse transcription polymerase chain reaction analysis with primers specific to AFP, Albumin, HNF4 $\alpha$ , and G6P. The data are shown as means expression values  $\pm$  SEM relative to GAPDH of triplicate measurements. EB, embryoid body, Mono, monolayer culture.

**Fig. S3. Purification of mES and iPSC cells from feeder cells for microarray analysis.** (A) Ten million of the bulk mES or iPSC and feeder cells were isolated and stained with PE-SSEA1, a cell surface-specific marker of mESC. SSEA1-positive cells were separated from feeder cells using MACS PE-conjugated MicroBeads followed by FACS analysis of purity. (A) Representative FACS plots of mES cells stained with isotope control (top) and PE-SSEA1 before after MACS separation demonstrate a high purity of MACS-isolated mES cells. (B) Fractions of cells expressing SSEA1 (red histograms) after MACS separation as shown by FACS analysis. Black histograms, isotype control. iPSC, induced pluripotent stem cells; HB-iPSC, hepatoblast-derived iPSC; AH-iPSC, adult hepatocyte-derived iPSC; MEF-iPSC, mouse embryonic fibroblast-derived iPSC.

**Fig. S4. Venn diagram analysis of donor memory genes in AH-iPSC, HB-iPSC and MEF-iPSC.** The numbers in the Venn diagrams indicate both unique and commonly dysregulated donor memory genes in AH-iPSC, HB-iPSC, and MEF-iPSC. The unique donor memory genes in HB-iPSC comprise of 62 up-regulated genes (red) and 142 down-regulated genes (blue). iPSC, induced pluripotent stem cells; HB-iPSC, hepatoblast-derived iPSC; AH-iPSC, adult hepatocyte-derived iPSC; MEF-iPSC, mouse embryonic fibroblast-derived iPSC.

**Fig. S5. Upregulation of DNMT1 and DNMT3b in iPSC cells generated in hepatic lineage cells.** (A) The expression levels of DNMT1 and (B) DNMT3b based on the analysis of microarray. The data represent the mean expression levels  $\pm$  SEM (n=4). iPSC, induced pluripotent stem cells; HB-iPSC, hepatoblast-derived iPSC; AH-iPSC, adult hepatocyte-derived



iPSC; MEF-iPSC, mouse embryonic fibroblast-derived iPSC; mESC, mouse embryonic stem cells.

**Fig. S6. HB-iPSC specific donor memory genes.** (A, B) Expression pattern of up-regulated HB-iPSC specific donor memory genes in the parental (A) and corresponding iPSC cells (B). The data are shown as means of  $\log_2$  fold changes relative to mES cells  $\pm$  SEM ( $n=4$ ). (C, D) Expression pattern of down-regulated HB-iPSC specific donor memory genes in parental (C) and corresponding iPSC (D) cells. The data are shown as means of  $\log_2$  fold changes relative to mES cells  $\pm$  SEM ( $n=4$ ). iPS, induced pluripotent stem cells; HB, hepatoblast; AH, adult hepatocyte; MEF, mouse embryonic fibroblast; HB-iPSC, hepatoblast-derived iPSC; AH-iPSC, adult hepatocyte-derived iPSC; MEF-iPSC, mouse embryonic fibroblast-derived iPSC. Red line indicates a two-fold expression differences as compared to mESC.

Fig. S1

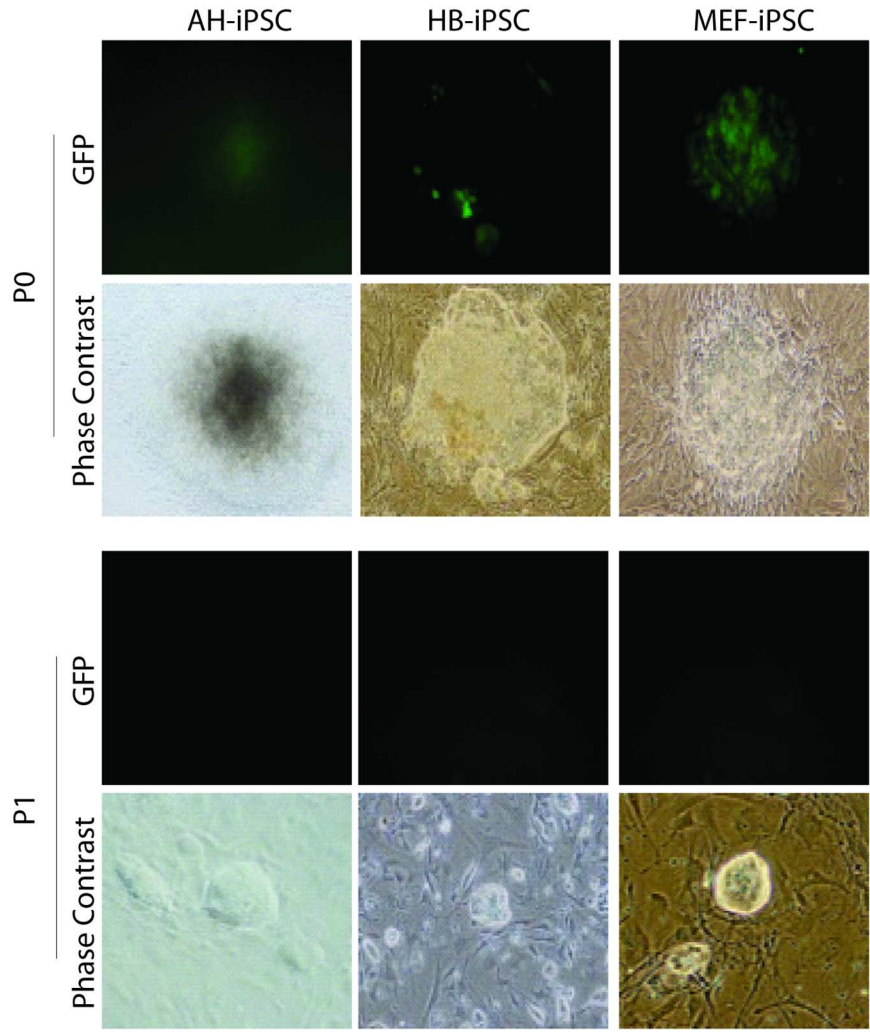

120x163mm (300 x 300 DPI)

Fig. S2

**A**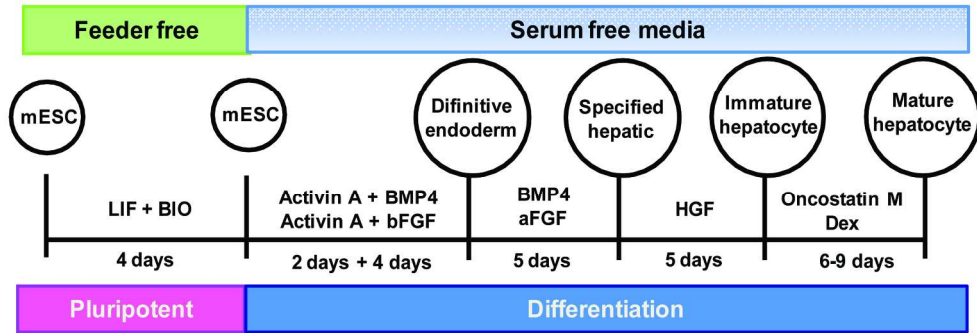**B**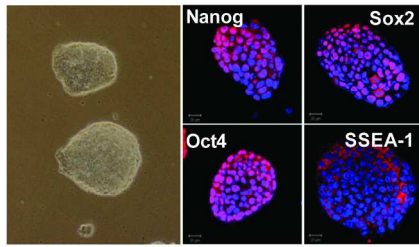**C**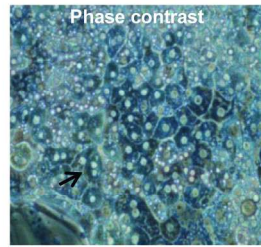**D**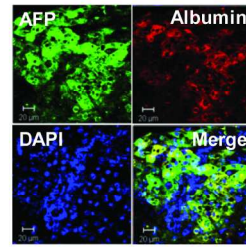**E**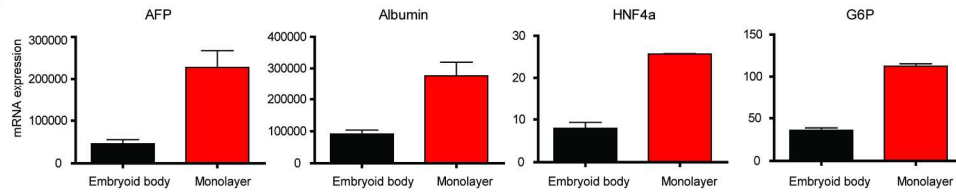

202x208mm (300 x 300 DPI)

Fig. S3

**A**

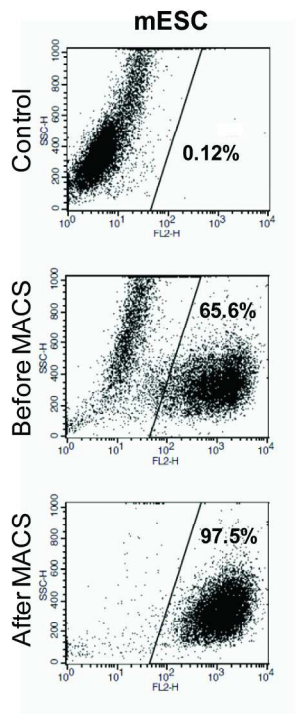

**B**

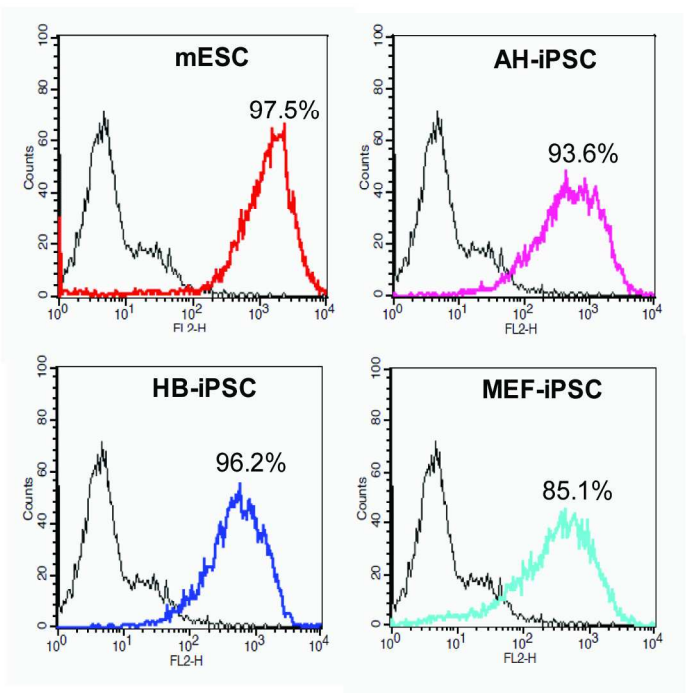

187x165mm (300 x 300 DPI)

Fig. S4

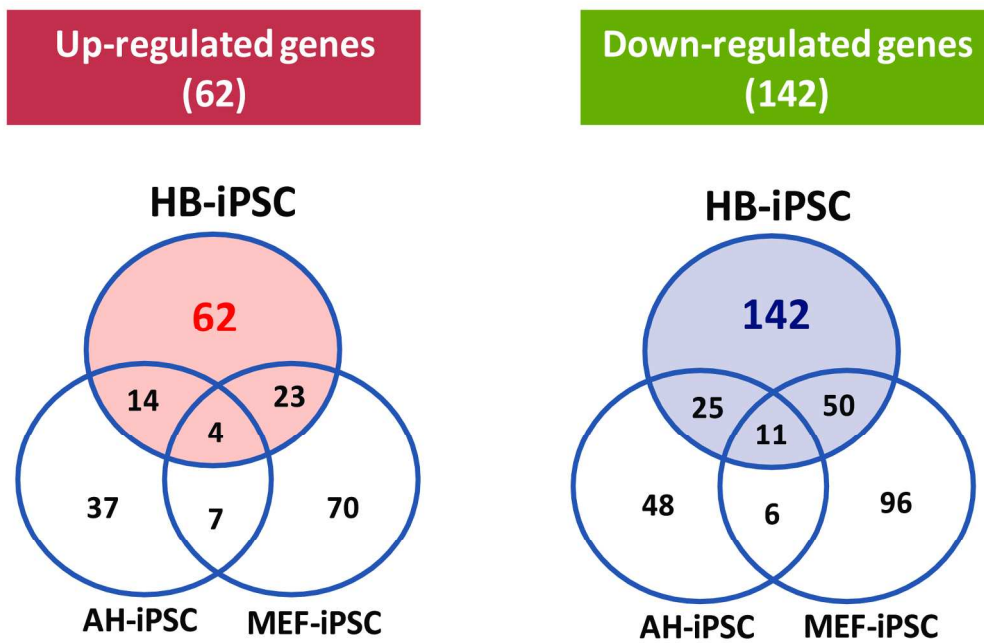

178x131mm (300 x 300 DPI)

Fig. S5

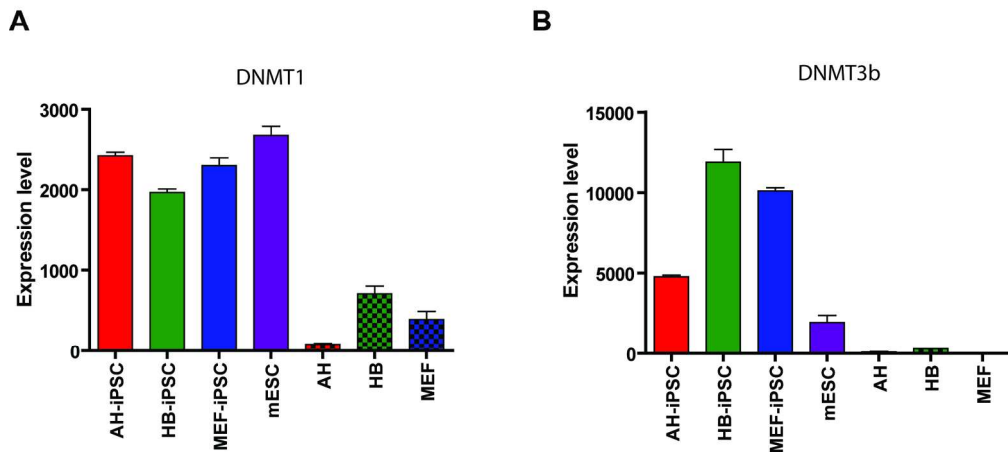

170x90mm (300 x 300 DPI)

Fig. S6

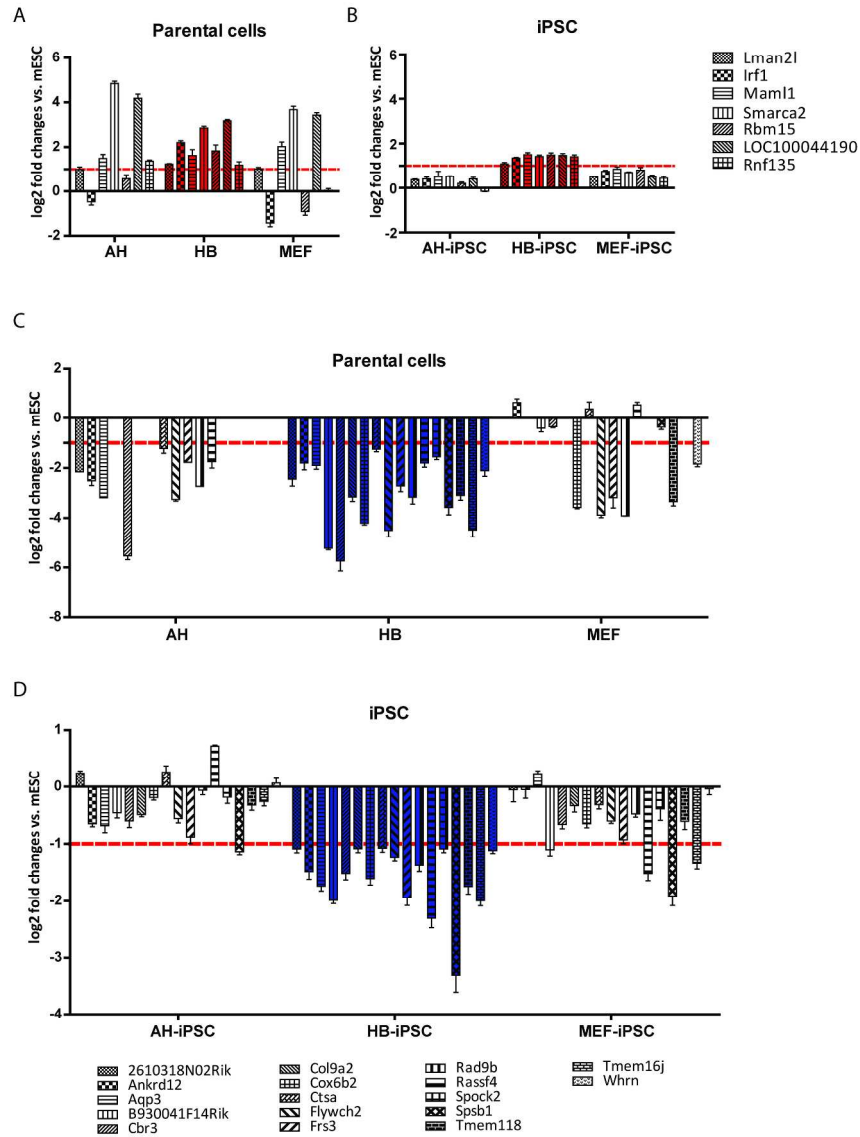

238x334mm (300 x 300 DPI)
